# Supplementary material
Source: HighWire-hosted journal article supplement (https://jnm.snmjournals.org/highwire/filestream/99017/field_highwire_adjunct_files/0/233098_Supplemental_Data.pdf)
Supplement: 233098_Supplemental_Data.pdf [file 233098_Supplemental_Data.pdf]

**Supplemental Figure 1.** Patients with persistently elevated PSA after initial RP and with PET/CT-positive recurrence outside initial treatment field.

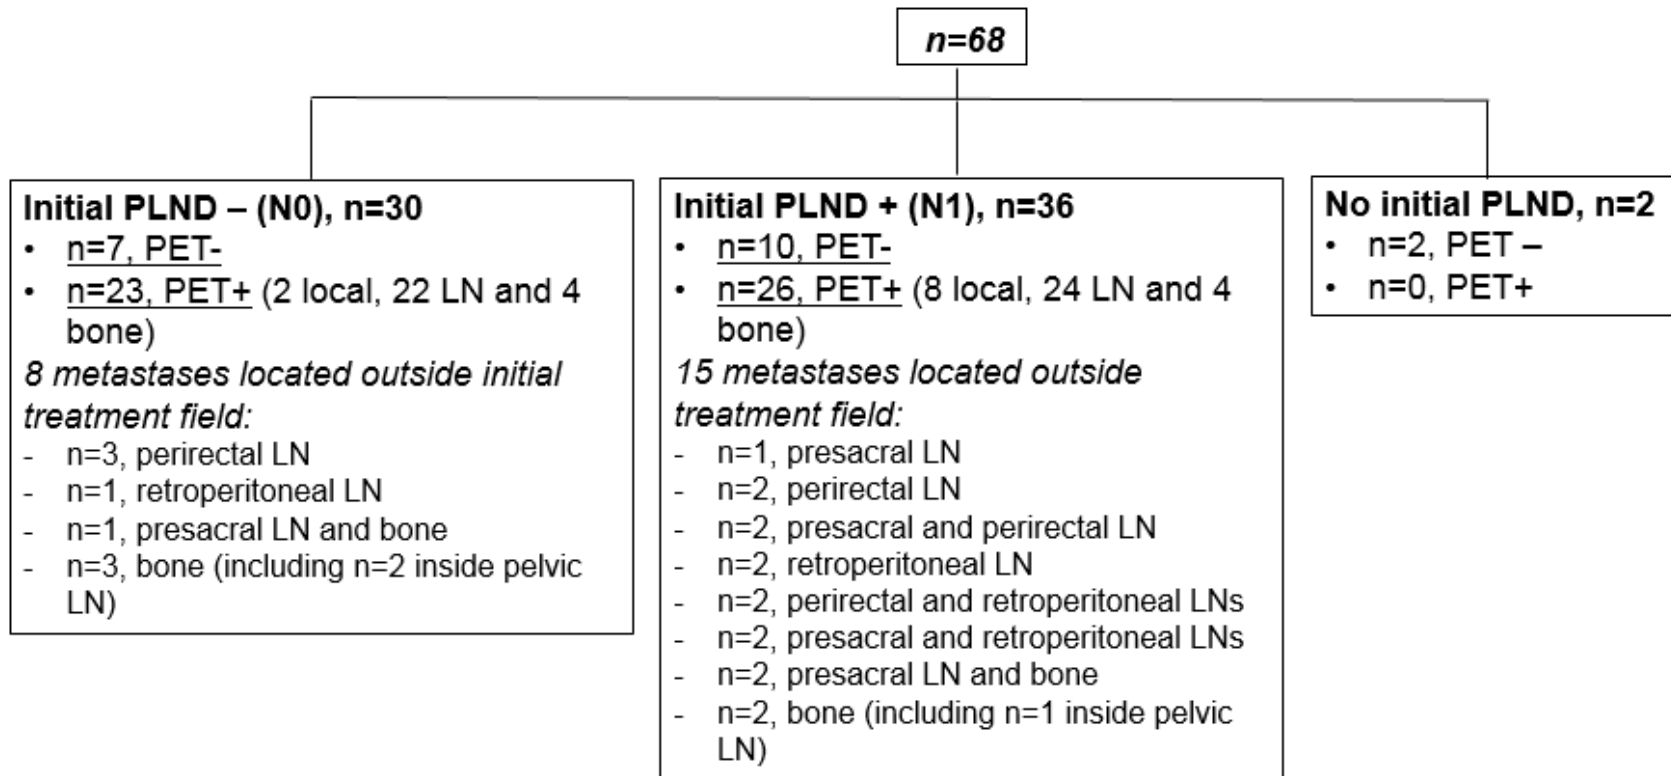

**Supplemental Figure 2.** Patients after initial RP followed by salvage RT with PET/CT-positive recurrence outside initial treatment field.

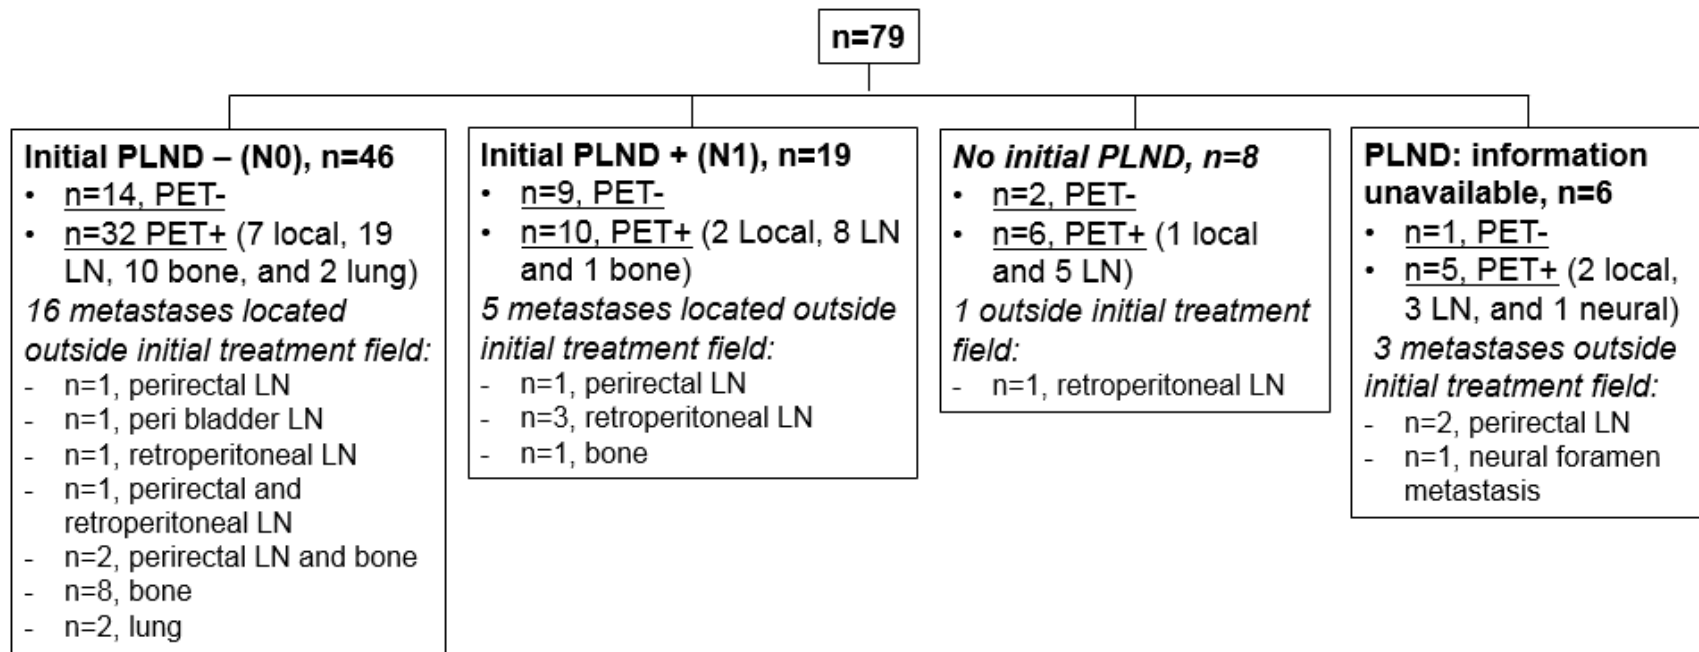

**Supplemental Figure 3.** Patients after initial RT with PET/CT-positive recurrence outside initial treatment field.

**n= 30**

- n=3, PET-
- n=27, PET+ (19 local, 15 LN, 5 bone, mediastinal LN and 1 lung)

*13 metastases located outside treatment field:*

- n=3, perirectal LN
- n=3, retroperitoneal LN
- n=5, bone (including n=1 inside pelvic LN)
- n=1, lung
- n=1, mediastinal LN

**Supplemental Table 1.** <sup>11</sup>C-choline PET/CT reading concordance: blinded reading by R1 vs. unblinded reading by R1 and unblinded reading by R1 vs. consensus reading

| Unblinded<br>Score | Blinded |    |     | Consensus |    |     | Total |
|--------------------|---------|----|-----|-----------|----|-----|-------|
|                    | 0       | 1  | 2   | 0         | 1  | 2   |       |
| 0                  | 83      | 4  | 0   | 80        | 4  | 3   | 87    |
| 1                  | 4       | 33 | 10  | 15        | 23 | 9   | 47    |
| 2                  | 3       | 3  | 147 | 3         | 7  | 143 | 153   |
| <b>Total</b>       | 90      | 40 | 157 | 98        | 34 | 155 | 287   |

The unblinded reading by R1 positivity agreed with the blinded one in 91.6% of cases overall and in 93.8%, 75.9%, and 94.8% for scores 0, 1, and 2, respectively. The *kappa* coefficient was 0.86, while the weighted *kappa* was 0.93.

The consensus reading positivity agreed with the unblinded reading by R1 one in 85.7% of cases overall and in 86.5%, 56.8%, and 92.9% for scores of 0, 1, and 2, respectively. The *kappa* coefficient was 0.76, while the weighted *kappa* was 0.87.

**Supplemental Table 2.** Patients classified as negative in the blinded reading and equivocal or positive by the unblinded or consensus reading.

| age | Gleason | TNM      | N   | category                | delay | PSA level | PSA dt | B | UB | C | Comments                                                                                                                                                                                               | Treatment and follow up                                                                                  |
|-----|---------|----------|-----|-------------------------|-------|-----------|--------|---|----|---|--------------------------------------------------------------------------------------------------------------------------------------------------------------------------------------------------------|----------------------------------------------------------------------------------------------------------|
| 63  | 9 (4+5) | pT3bN0   | III | PSA still high after RP | 0.44  | 0.25      | -      | 0 | 0  | 2 | Faint uptake in small pelvic LNs not seen by the first reader                                                                                                                                          | Salvage RT, after PSA<0.05ng/mL                                                                          |
| 66  | 8 (4+4) | pT3bN1   | IV  | PSA still high after RP | 0.41  | 2.7       | -      | 0 | 1  | 1 | After unblinded, small right int iliac LN with faint uptake doubtful because of PSA level and N1                                                                                                       | Salvage RT+HT, PSA decreased after therapy                                                               |
| 62  | 7 (4+3) | pT3aN0M0 | III | RP+RT                   | 2.20  | 3.6       | 0.8    | 0 | 0  | 1 | Consensus: doubtful faint pelvic uptake (PSA level)                                                                                                                                                    | HT, PSA continue to increase, 4 months after PSA=23.5, new imaging: bone metastasis. Treatment: Olaparib |
| 55  | 7 (3+4) | pT3aN0   | III | RP+RT                   | 5.04  | 0.25      | 10.5   | 0 | 0  | 1 | Small LN left ext iliac with faint uptake consider inflammatory by the first reader and doubtful after consensus                                                                                       | Observation. 5 months after PSA=0.43ng/mL. New choline PET: unchanged. Continue observation              |
| 68  | 8 (4+4) | pT3bN1   | IV  | RP                      | 1.22  | 0.3       | 1.7    | 0 | 0  | 1 | After consensus, doubtful local recurrence                                                                                                                                                             | Salvage RT, after PSA<0.05ng/mL                                                                          |
| 71  | 7 (3+4) | pT2bN0   | IIA | RP                      | 2.33  | 0.22      | 8.67   | 0 | 0  | 1 | B and UB: T12 right mild uptake without CT correlation, negative in NAC images, seems unspecific. After consensus T12 bone lesion consider as doubtful                                                 | Salvage RT pelvic only (T12 not included), after PSA<0.05ng/mL<br>→ False positive consensus reading     |
| 75  | 7 (3+4) | pT3aN0   | III | RP                      | 11.44 | 0.6       | 29.7   | 0 | 0  | 2 | B and UB: Iliac distal LNs most likely inflammatory: bilat, fat center and uptake decrease between dynamic, static and final images. After consensus, LNs considered positive because of the PSA level | Salvage RT, after PSA<0.05ng/mL                                                                          |

|    |          |          |     |       |       |      |      |   |   |   |                                                                                                                                                                                                 |                                                                         |
|----|----------|----------|-----|-------|-------|------|------|---|---|---|-------------------------------------------------------------------------------------------------------------------------------------------------------------------------------------------------|-------------------------------------------------------------------------|
| 70 | 6 (3+3)  | pT2bR0N0 | IIA | RP    | 16.98 | 0.5  | 6    | 0 | 2 | 2 | After unblinded (PSA level and dt): left pararectal LN with mild uptake SUV 1.5 suspicious                                                                                                      | biopsy LN para rectal left: positive. Treatment: RT+HT, after PSA< 0.05 |
| 75 | 7 (3+4)  | pT2cN0   | IIB | RP+RT | 17.11 | 0.6  | 16.6 | 0 | 1 | 2 | After unblinded: mild doubtful local uptake corresponding to the local equivocal nodule described on MRI. After consensus, local uptake considered as suspicious                                | Follow up because of co-morbidities                                     |
| 68 | 9 (4+5)  | pT2bN0   | IIB | RP    | 0.66  | 0.3  | 1.9  | 0 | 2 | 2 | After unblinded (Gleason, delay between surgery and rising PSA and PSA dt) suspicious LNs right ext iliac SUVmax 2.3 and right common iliac                                                     | Salvage RT+HT, after PSA< 0.05                                          |
| 69 | 10 (5+5) | pT3bN1   | IV  | RP+RT | 7.80  | 2.2  | 4.4  | 0 | 1 | 1 | After unblinded (initial Gleason, N1 and PSA level and dt): right ext iliac LN initially considered as inflammatory considered as doubtful                                                      | HT                                                                      |
| 76 | 7 (3+4)  | ?        | ?   | RP+RT | 15.72 | 10.4 | 11   | 0 | 1 | 0 | After unblinded (high PSA level) small LNs left obturator and ext iliac SUVmax 1.1 initially considered as inflammatory considered as doubtful. Finally considered inflammatory after consensus | HT                                                                      |
| 70 | 7 (4+3)  | pT3aN0   | III | RP    | 4.56  | 0.7  | 1.4  | 0 | 0 | 2 | B and UB: reactive inguinal and ext iliac distal LNs<br>After consensus: ext iliac and RP LNs suspicious because PSA level                                                                      | Salvage RT+HT, after PSA< 0.05                                          |
| 82 | 7 (4+3)  | maxT2b   | IIA | RT    | 4.76  | 10.7 | 9.4  | 0 | 2 | 2 | B: pulmonary nodule linked with other disease<br>After unblinded: mild avid lung nodule suspicious in the context (PSA high and no other avidity)                                               | HT                                                                      |

N= NCCN grade; delay= time between initial treatment and PET (years); PSA level ng/mL; PSA<sub>dt</sub>= PSA doubling time in months; Scores for B= blinded reading, UB= unblinded reading, C=consensus reading; LN= lymph node.

**Supplemental Table 3.** Correlation between <sup>11</sup>C-choline PET/CT positivity and clinical findings (scores 1 and 2 considered positive)

| Factors                       | N   | OR   | 95% CI     | Univariate p-value |
|-------------------------------|-----|------|------------|--------------------|
| <b>Gleason score</b>          | 285 |      |            | 0.24               |
| 6-7                           |     | Ref. |            |                    |
| 8                             |     | 1.48 | 0.74, 3.10 |                    |
| 9-10                          |     | 1.62 | 0.86, 3.16 |                    |
| <b>NCCN</b>                   | 272 |      |            | 0.78               |
| I-II                          |     | Ref. |            |                    |
| III                           |     | 0.98 | 0.53, 1.81 |                    |
| IV                            |     | 0.82 | 0.43, 1.53 |                    |
| <b>Log(PSA)</b>               | 287 | 2.21 | 1.73, 2.90 | <b>&lt;0.001</b>   |
| <b>Log(PSA DT)</b>            | 209 | 1.27 | 0.93, 1.75 | <b>0.13</b>        |
| <b>Log(PSA velocity)</b>      | 209 | 1.54 | 1.24, 1.94 | <b>&lt;0.001</b>   |
| <b>Log(Time) *</b>            | 286 | 0.81 | 0.59, 1.08 | <b>0.17</b>        |
| <b>Log(Time)<sup>2</sup>*</b> | 286 | 1.16 | 0.98, 1.37 | <b>0.08</b>        |
| <b>Initial treatment</b>      | 208 |      |            | <b>&lt;0.001</b>   |
| RP                            |     | Ref. |            |                    |
| RT                            |     | 12.5 | 3.52, 80.0 |                    |
| Persistently elevated PSA     |     | 2.40 | 1.27, 4.67 |                    |

\* LogTime and LogTime squared are analyzed together in the same model. In univariate analysis, increasing log(PSA) value, increasing log(velocity), as well as RT treatment and persistently elevated PSA are associated with a higher risk of scan positivity.

Variables with a p-value <0.20 in univariate analysis were entered in the multivariate model.

When adjusted for the other variables, only the value of log(PSA) was associated with the risk of having a positive scan: OR = 2.21 (95% CI 1.73, 2.90; p<0.001).

**Supplemental Table 4.** Examples of patients for whom <sup>11</sup>C-choline PET had an impact on management

| age | Gleason | TNM        | N   | category                | delay | PSA level | PSA dt | B | UB | C | <sup>11</sup> C-Choline findings                                                                                                                        | Other prior imaging findings                               | Treatment and follow up                                                                                           |
|-----|---------|------------|-----|-------------------------|-------|-----------|--------|---|----|---|---------------------------------------------------------------------------------------------------------------------------------------------------------|------------------------------------------------------------|-------------------------------------------------------------------------------------------------------------------|
| 63  | 9 (4+5) | pT3bR0N0M0 | III | PSA still high after RP | 0.38  | 2.23      | -      | 2 | 2  | 2 | LN metastases left pre-sacral (SUVmax 6.7) and 4 <sup>th</sup> rib uptake (SUVmax 8.5) highly suspicious of bone metastasis                             | Pelvic MRI and bone scintigraphy negative                  | Rib biopsy: positive for PCa metastasis<br>Treatment: HT                                                          |
| 73  | 7 (4+3) | pT3aN1M0   | IV  | PSA still high after RP | 0.26  | 0.35      | -      | 2 | 2  | 2 | Small LN right para rectal (SUVmax 1.3), positive on NAC images, suspicious of metastasis                                                               | Pelvic MRI: no recurrence                                  | Modification of the RT field including pararectal area.<br>Treatment: RT (prostatic bed and nodes), then PSA<0.05 |
| 70  | 9(4+5)  | pT3aN1M0   | IV  | RP+RT                   | 1.88  | 1.11      | 0.6    | 2 | 2  | 2 | T5 bone metastasis left anterior (SUVmax 6.6)                                                                                                           | CT and bone scintigraphy: negative                         | Bone MRI: T5 suspicious<br>T5 biopsy: positive for PCa metastasis<br>Treatment: T5 RT and HT, after PSA<0.05      |
| 58  | 7 (3+4) | pT3bN0M0   | III | RP                      | 7.80  | 0.2       | 11.62  | 2 | 2  | 2 | LN metastatic right internal iliac (SUVmax 2.4)                                                                                                         | Pelvic MRI and bone scintigraphy negative                  | Right int iliac LN dissection: positive.                                                                          |
| 59  | 7(4+3)  | ?          | ?   | RT                      | 3.31  | 47.32     | 4.1    | 2 | 2  | 2 | Local recurrence (SUVmax 4.8) and LN metastasis: obturator, external iliac, common iliac (left: SUVmax 15), peri aortic and infra mediastinal posterior | Chest-abdomen-pelvis CT: no evidence of metastatic disease | Treatment: HT                                                                                                     |

N= NCCN grade; delay= time between initial treatment and PET (years); PSA level ng/mL; PSA dt = PSA doubling time in months; Scores for

B= blinded reading, UB= unblinded reading, C=consensus reading, LN= lymph node, ?=unknown.
